# Supplementary material for: Fe/Al pillared clay catalyzed solvent-free synthesis of bisindolylmethanes using diversely substituted indoles and carbonyl compounds
Source: Royal Society of Chemistry journal article supplement (doi:10.1039/c2ra22258b), 2012-12-11
Supplement: c2ra22258b.pdf [file c2ra22258b.pdf]

## Supporting Information

### Fe/Al pillared clay catalyzed solvent-free synthesis of bisindolylmethanes using diversely substituted indoles and carbonyl compounds.

*Deepak Kumar Sharma,<sup>a</sup> Altaf Hussain,<sup>a</sup> Mallikharjuna Rao Lambu,<sup>a</sup> Syed Khalid Yousuf,<sup>a</sup> Sudip Maiety,<sup>b</sup> Baldev Singh<sup>a</sup> and Debaraj Mukherjee<sup>\*a</sup>*

|                                                                              |    |
|------------------------------------------------------------------------------|----|
| <sup>1</sup> H and <sup>13</sup> C NMR spectra of compound <b>3a</b> : ..... | S2 |
| <sup>1</sup> H and <sup>13</sup> C NMR spectra of compound <b>3b</b> : ..... | S3 |
| <sup>1</sup> H and <sup>13</sup> C NMR spectra of compound <b>3c</b> : ..... | S4 |
| <sup>1</sup> H and <sup>13</sup> C NMR spectra of compound <b>4a</b> : ..... | S5 |
| <sup>1</sup> H and <sup>13</sup> C NMR spectra of compound <b>5a</b> : ..... | S6 |
| <sup>1</sup> H and <sup>13</sup> C NMR spectra of compound <b>6a</b> : ..... | S7 |
| <sup>1</sup> H and <sup>13</sup> C NMR spectra of compound <b>8a</b> : ..... | S8 |
| HPLC Method <b>A</b> for compound <b>1a-3d</b> : .....                       | S9 |
| HPLC Method <b>B</b> for compound <b>4a-8a</b> : .....                       | S9 |

### $^1\text{H}$ and $^{13}\text{C}$ NMR of some of the selected compounds

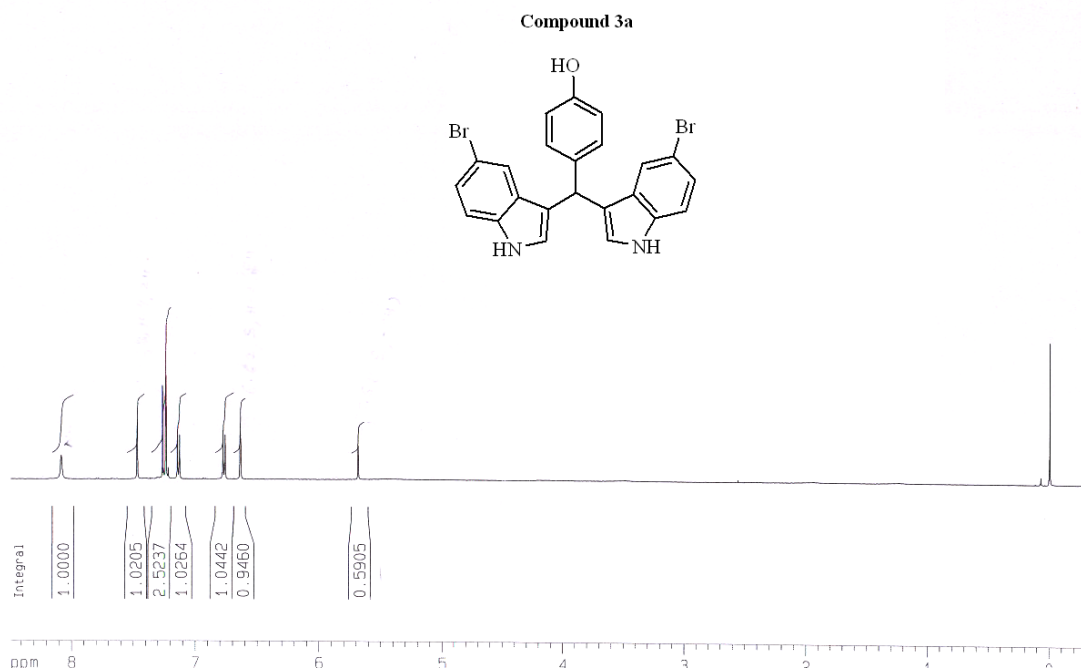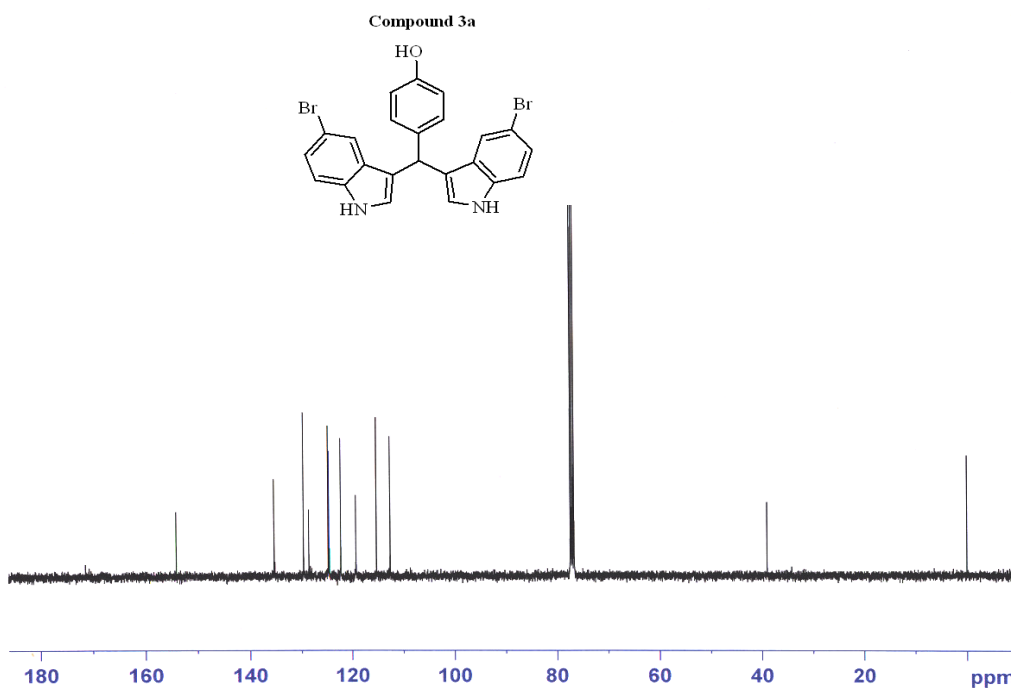

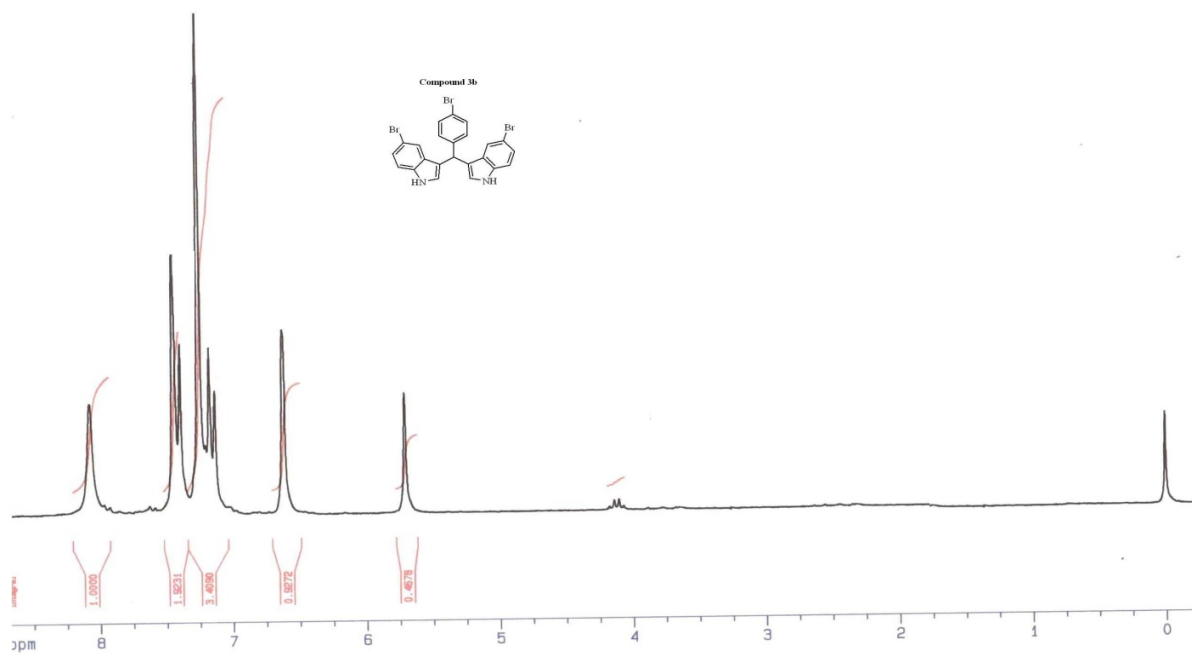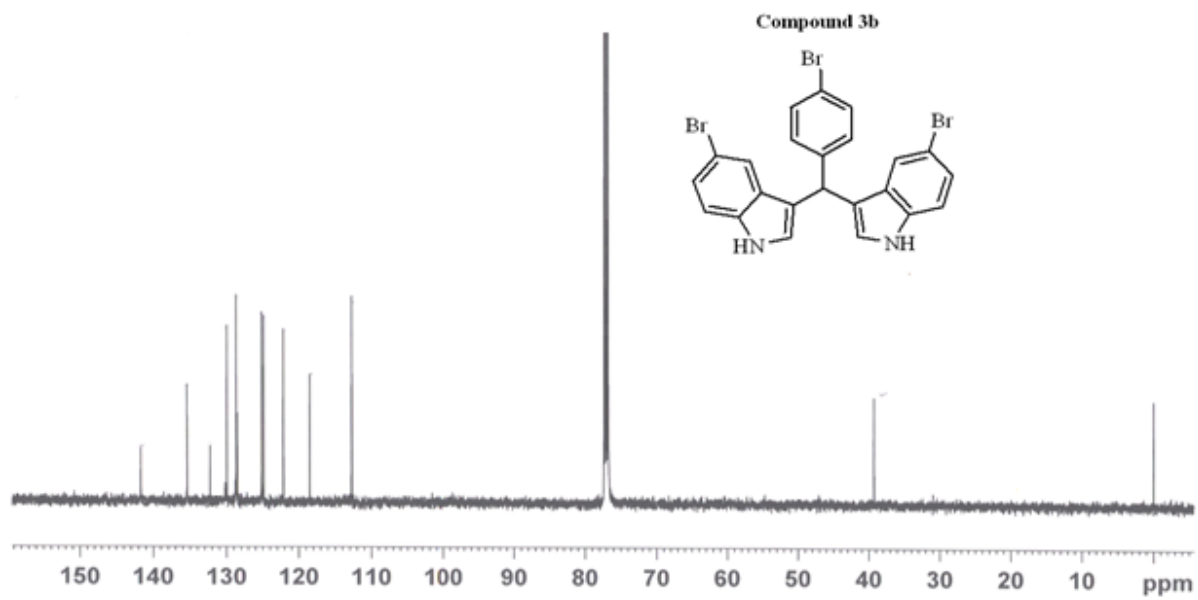

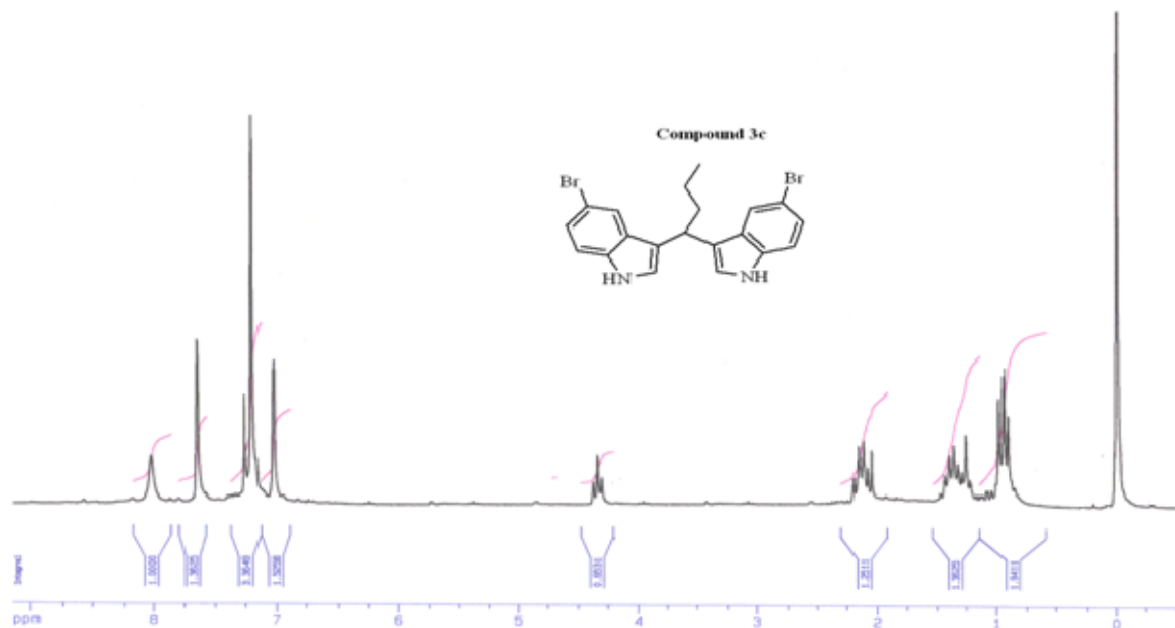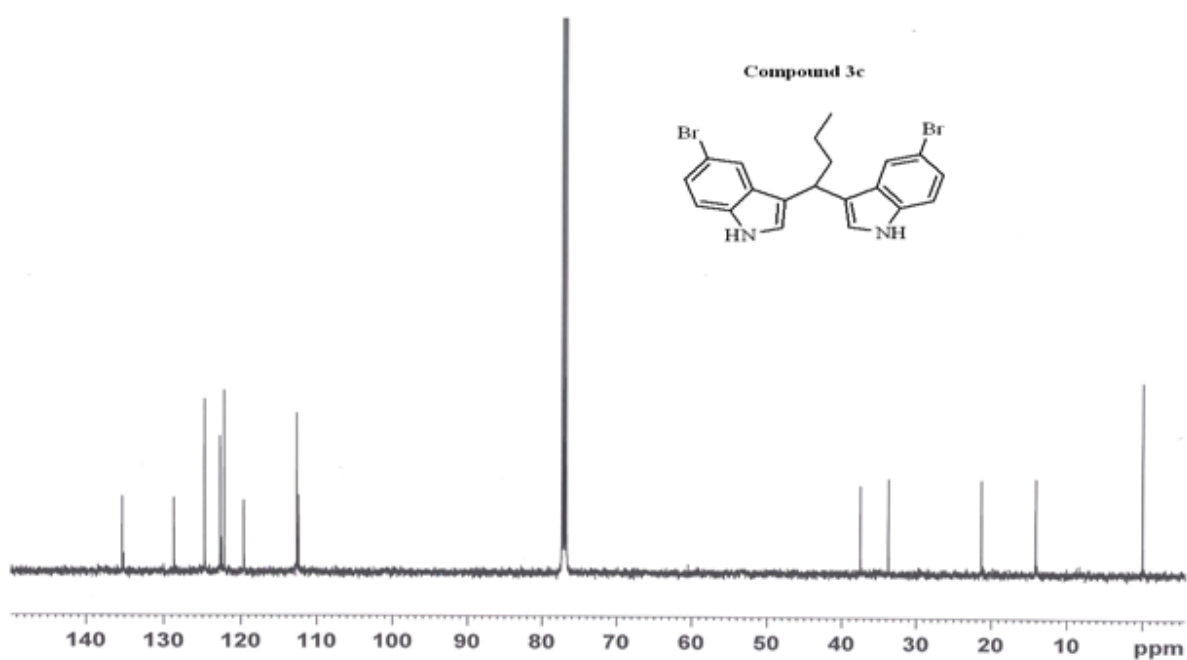

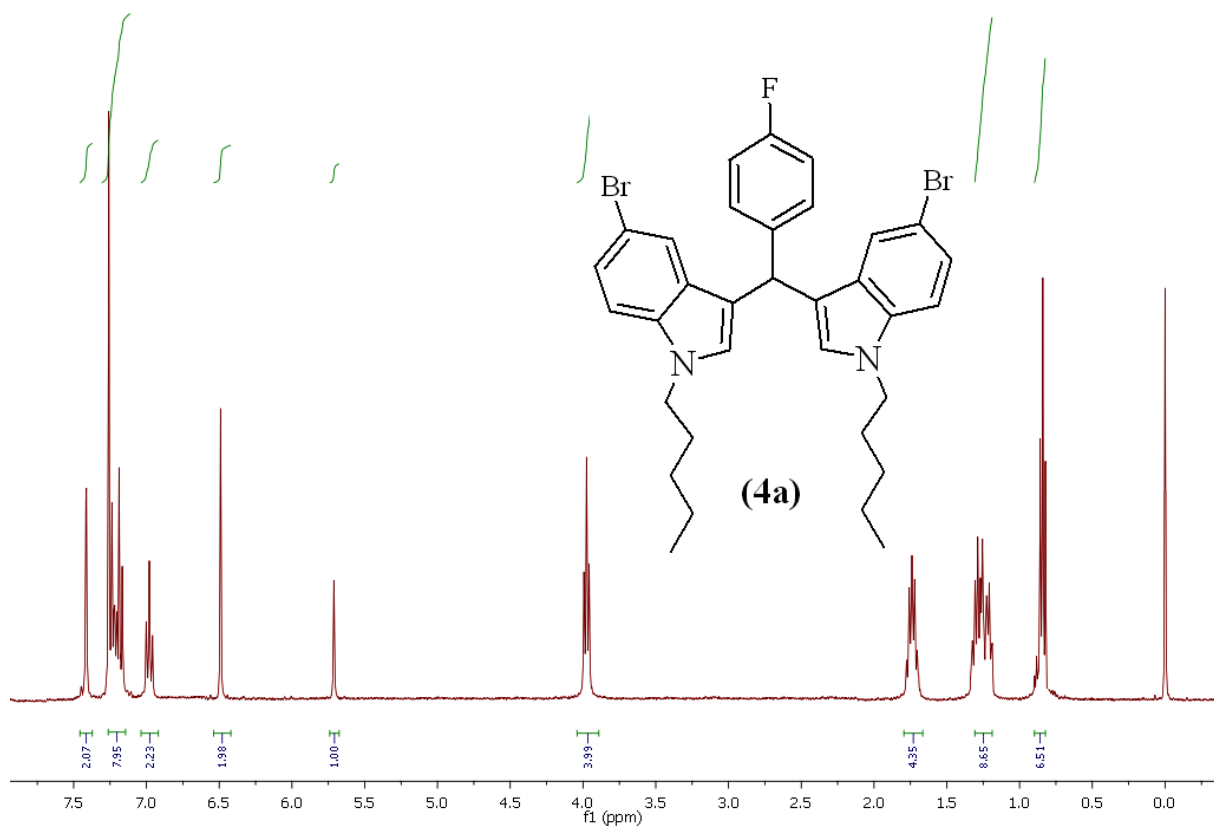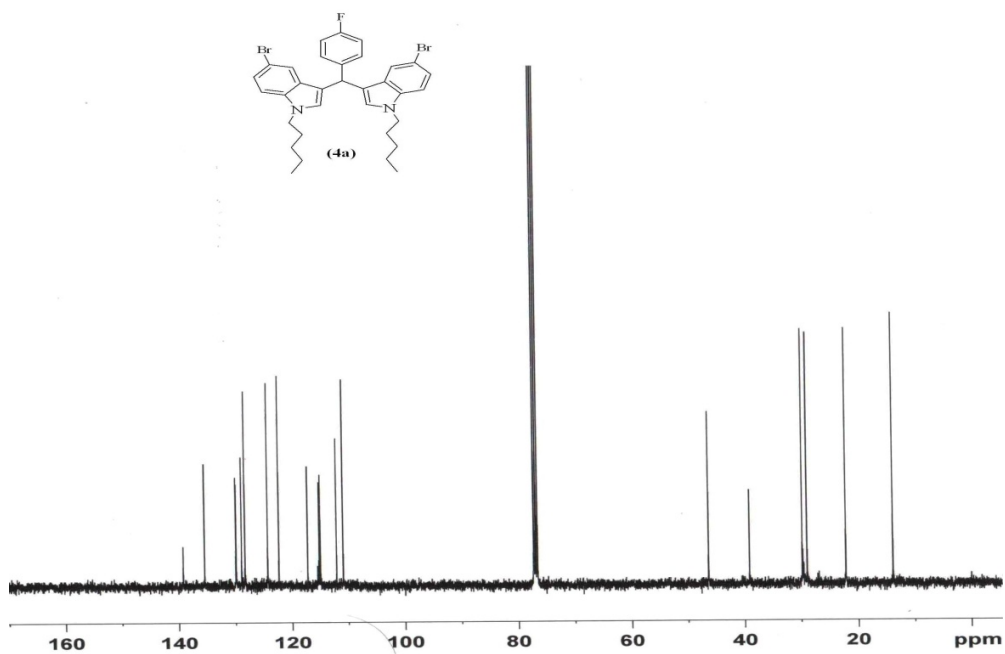

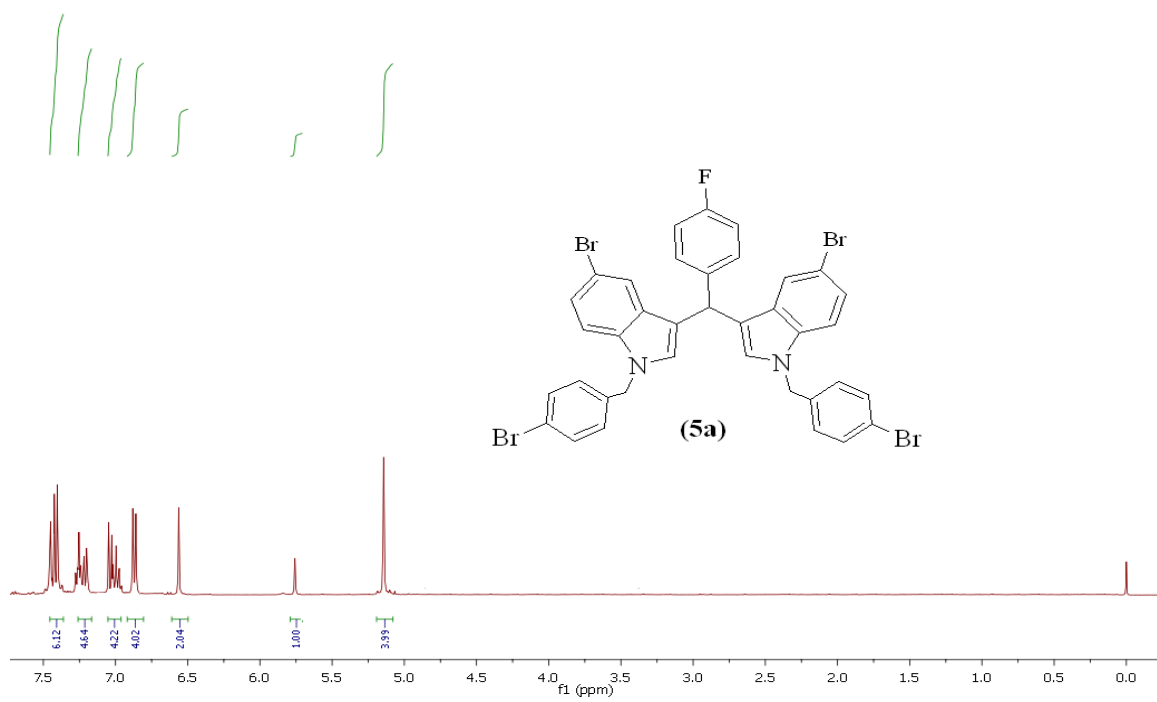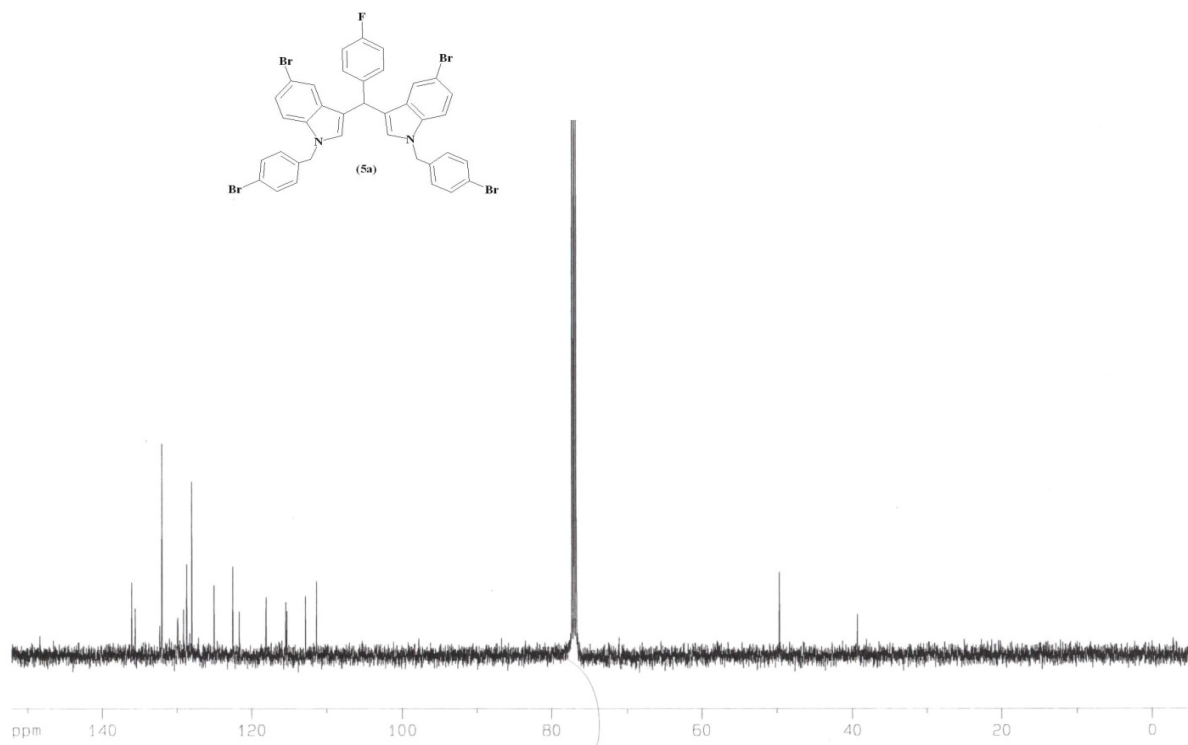

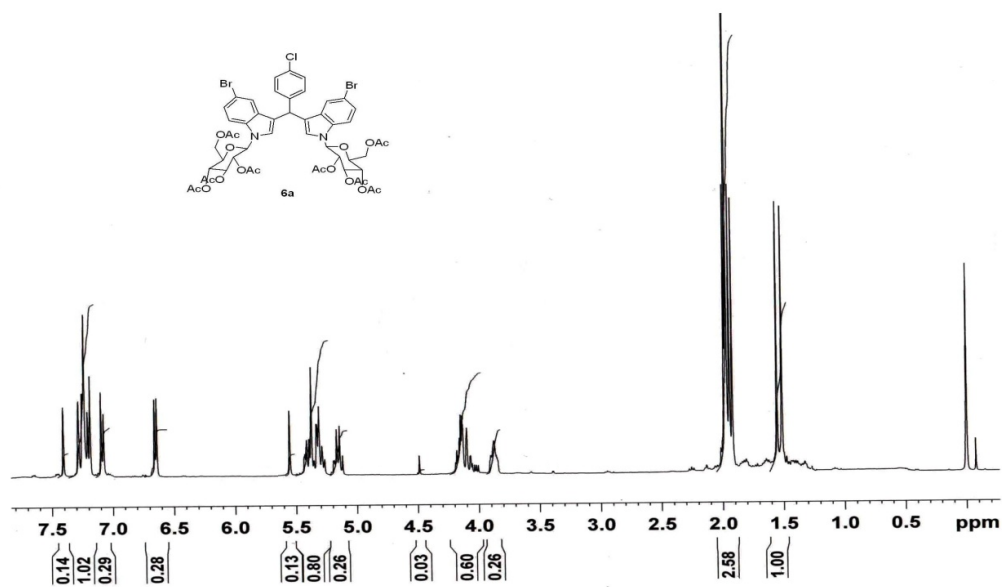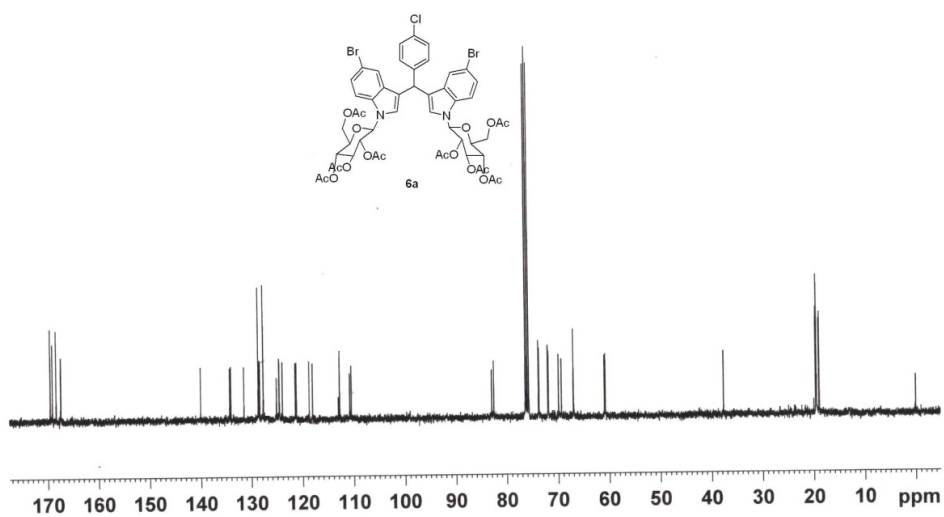

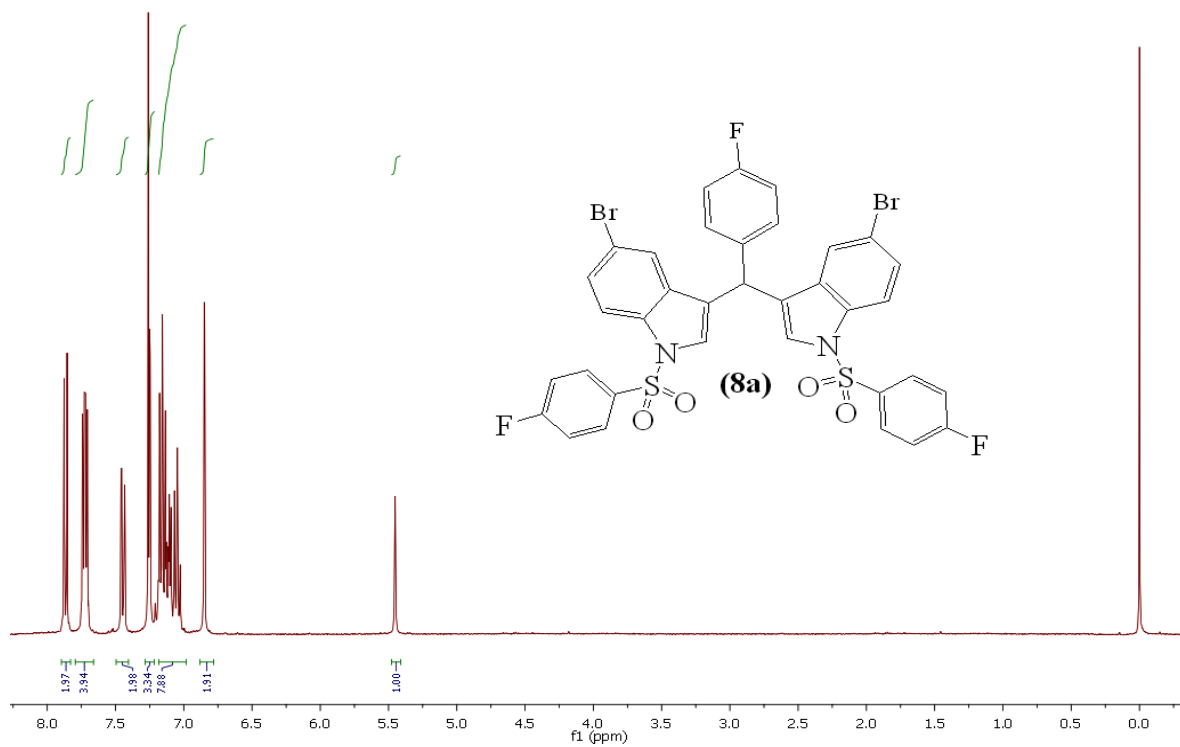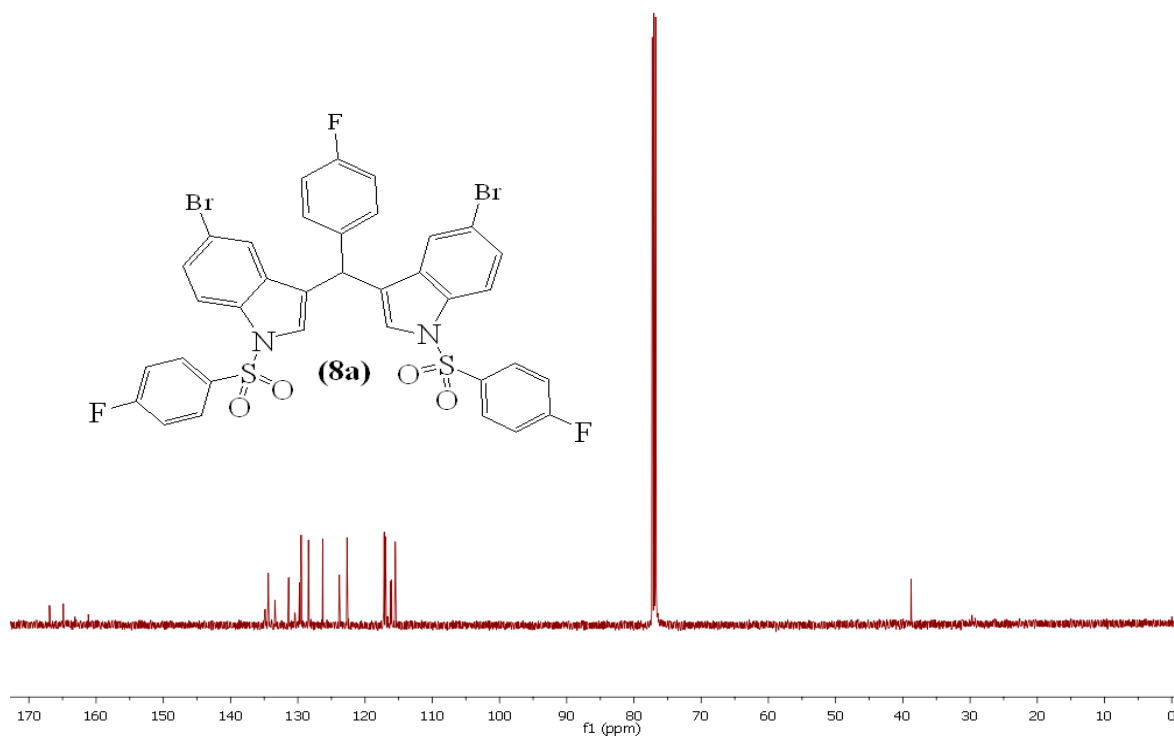



**HPLC Method A** for compounds **3a-3d**:

Injection volume: 10µl

Methanol (B), Water (A), column RP-18 (E-Merck, 5µm, 4.0 x 250 mm), Column temp. 30 °C,  
Flow Rate 0.8 ml/min.

|       |      |   |     |     |    |    |
|-------|------|---|-----|-----|----|----|
| Time  | 0.01 | 5 | 35  | 40  | 50 | 55 |
| B (%) | 5    | 5 | 100 | 100 | 5  | 5  |

**HPLC Method B** for compounds **4a-8a**:

**C-18 Column:** 100mm x 4.6mm (3.5µ particle size)

**Mobile Phase Gradient:** CH<sub>3</sub>CN:H<sub>2</sub>O gradient (2:98 to 100:0 over 10 min. then 100% CH<sub>3</sub>CN for over 15 min.).
